# Supplementary material for: Consumers’ Acceptability and Perception of Edible Insects as an Emerging Protein Source
Source: Int J Environ Res Public Health. 2022 Nov 26;19(23):15756. doi: 10.3390/ijerph192315756 (PMC9739510; doi:10.3390/ijerph192315756)
Supplement: Supplementary file 1 [file ijerph-19-15756-s001.zip › Table S1.pdf]

**Table S1.** Distribution of questionnaire responses by the participants' gender (95% CI).

|                                                                                                                                 | <b>Male<br/>N (%)</b> | <b>Female<br/>N (%)</b> | <b>B<br/>(95% CI)</b> |
|---------------------------------------------------------------------------------------------------------------------------------|-----------------------|-------------------------|-----------------------|
| <b>When it comes to cooking, do you like trying new things or being innovative with how you prepare your food?</b>              |                       |                         | p=0.632               |
| Yes                                                                                                                             | 258 (24.95%)          | 566 (54.73%)            |                       |
| No                                                                                                                              | 62 (5.99%)            | 147 (14.21%)            |                       |
| <b>In the past year, have you introduced new foods into your diet?</b>                                                          |                       |                         | p=0.568               |
| Yes                                                                                                                             | 148 (14.31%)          | 350 (33.84%)            |                       |
| No                                                                                                                              | 172 (16.63%)          | 364 (35.2%)             |                       |
| <b>Have you ever eaten insects?</b>                                                                                             |                       |                         | p=0.008               |
| Yes                                                                                                                             | 50 (4.83%)            | 86 (8.31%)              |                       |
| No                                                                                                                              | 270 (26.11%)          | 628 (60.73%)            |                       |
| <b>Would you include insects in your usual diet?</b>                                                                            |                       |                         | p<.001                |
| Yes                                                                                                                             | 84 (8.12%)            | 87 (8.41%)              |                       |
| No                                                                                                                              | 233 (22.53%)          | 617 (56.67%)            |                       |
| <b>Would you be willing to cook insects at home?</b>                                                                            |                       |                         | p<.001                |
| Yes                                                                                                                             | 139 (13.44%)          | 151 (14.6%)             |                       |
| No                                                                                                                              | 180 (17.4%)           | 555 (53.67%)            |                       |
| <b>Would you offer insect-based dishes in a restaurant?</b>                                                                     |                       |                         | p=0.058               |
| Yes                                                                                                                             | 112 (10.83%)          | 147 (14.21%)            |                       |
| No                                                                                                                              | 204 (19.72%)          | 560 (54.15%)            |                       |
| <b>Do you think insect-based dishes would be welcomed by the general public?</b>                                                |                       |                         | p=0.037               |
| Yes                                                                                                                             | 64 (6.18%)            | 106 (10.25%)            |                       |
| No                                                                                                                              | 251 (24.27%)          | 595 (57.54%)            |                       |
| <b>Would knowing that insect consumption has the potential to be a sustainable food practice encourage you to consume them?</b> |                       |                         | p=0.007               |
| Yes                                                                                                                             | 185 (17.89%)          | 326 (31.52%)            |                       |
| No                                                                                                                              | 127 (12.28%)          | 372 (35.97%)            |                       |
| <b>Do you think insect consumption might become a common practice in the future?</b>                                            |                       |                         | p=0.324               |
| Yes                                                                                                                             | 212 (20.5%)           | 391 (37.81%)            |                       |
| No                                                                                                                              | 100 (9.67%)           | 303 (29.3%)             |                       |
| <b>In what preparations do you think insects would be more attractive?</b>                                                      |                       |                         | p=0.003               |
| If their natural appearance cannot be seen                                                                                      | 186 (17.98%)          | 536 (51.83%)            |                       |
| If their natural appearance can be seen                                                                                         | 47 (4.54%)            | 55 (5.31%)              |                       |

The table excludes the non-binary gender response as there was only one.
