# Supplementary material for: Consumers’ Acceptability and Perception of Edible Insects as an Emerging Protein Source
Source: Int J Environ Res Public Health. 2022 Nov 26;19(23):15756. doi: 10.3390/ijerph192315756 (PMC9739510; doi:10.3390/ijerph192315756)
Supplement: Supplementary file 1 [file ijerph-19-15756-s001.zip › Table S2.pdf]

**Table S2.** Distribution of questionnaire responses by the participants' age (95% CI).

|                                                                                                                        | 18-24 years<br>N (%) | 25-39 years<br>N (%) | 40-49 years<br>N (%) | 50-59 years<br>N (%) | 60 years or<br>over<br>N (%) | B<br>(95% CI) |
|------------------------------------------------------------------------------------------------------------------------|----------------------|----------------------|----------------------|----------------------|------------------------------|---------------|
| <b>When it comes to cooking, do you like trying new things<br/>or being innovative with how you prepare your food?</b> |                      |                      |                      |                      |                              | p<.001        |
| Yes                                                                                                                    | 129 (12.47%)         | 167 (16.15%)         | 227 (21.95%)         | 253 (24.46%)         | 49 (4.73%)                   |               |
| No                                                                                                                     | 31 (2.99%)           | 24 (2.32%)           | 47 (4.54%)           | 88 (8.51%)           | 19 (1.83%)                   |               |
| <b>In the past year, have you introduced new foods into<br/>your diet?</b>                                             |                      |                      |                      |                      |                              | p<.001        |
| Yes                                                                                                                    | 57 (5.51%)           | 100 (9.67%)          | 153 (14.79%)         | 150 (14.5%)          | 38 (3.67%)                   |               |
| No                                                                                                                     | 103 (9.96%)          | 91 (8.8%)            | 121 (11.7%)          | 191 (18.47%)         | 30 (2.9%)                    |               |
| <b>Have you ever eaten insects?</b>                                                                                    |                      |                      |                      |                      |                              | p<.001        |
| Yes                                                                                                                    | 18 (1.74%)           | 32 (3.09%)           | 35 (3.38%)           | 39 (3.77%)           | 12 (1.16%)                   |               |
| No                                                                                                                     | 142 (13.73%)         | 159 (15.37%)         | 239 (23.11%)         | 302 (29.2%)          | 56 (5.41%)                   |               |
| <b>Would you include insects in your usual diet?</b>                                                                   |                      |                      |                      |                      |                              | p<.001        |
| Yes                                                                                                                    | 27 (2.61%)           | 32 (3.09%)           | 53 (5.12%)           | 48 (4.64%)           | 11 (1.06%)                   |               |
| No                                                                                                                     | 132 (12.76%)         | 154 (14.89%)         | 217 (20.98%)         | 291 (28.14%)         | 56 (5.41%)                   |               |
| <b>Would you be willing to cook insects at home?</b>                                                                   |                      |                      |                      |                      |                              | p<.001        |
| Yes                                                                                                                    | 63 (6.09%)           | 56 (5.41%)           | 86 (8.31%)           | 69 (6.67%)           | 16 (1.54%)                   |               |
| No                                                                                                                     | 96 (9.28%)           | 132 (12.76%)         | 186 (17.98%)         | 269 (26.01%)         | 52 (5.02%)                   |               |
| <b>Would you offer insect-based dishes in a restaurant?</b>                                                            |                      |                      |                      |                      |                              | p<.001        |
| Yes                                                                                                                    | 44 (4.25%)           | 44 (4.25%)           | 82 (7.93%)           | 76 (7.35%)           | 13 (1.25%)                   |               |
| No                                                                                                                     | 115 (11.12%)         | 143 (13.82%)         | 190 (18.37%)         | 262 (25.33%)         | 54 (5.22%)                   |               |
| <b>Do you think insect-based dishes would be welcomed<br/>by the general public?</b>                                   |                      |                      |                      |                      |                              | p<.001        |
| Yes                                                                                                                    | 27 (2.61%)           | 30 (2.9%)            | 54 (5.22%)           | 49 (4.73%)           | 10 (0.96%)                   |               |
| No                                                                                                                     | 132 (12.76%)         | 157 (15.18%)         | 215 (20.79%)         | 286 (27.65%)         | 26 (5.41%)                   |               |

|                                                                                                                                 |            |              |              |              |            |         |
|---------------------------------------------------------------------------------------------------------------------------------|------------|--------------|--------------|--------------|------------|---------|
| <b>Would knowing that insect consumption has the potential to be a sustainable food practice encourage you to consume them?</b> |            |              |              |              |            | p=0.071 |
| Yes                                                                                                                             | 92 (8.89%) | 100 (9.67%)  | 142 (13.73%) | 140 (13.53%) | 37 (3.57%) |         |
| No                                                                                                                              | 63 (6.09%) | 86 (8.31%)   | 128 (12.37%) | 193 (12.37%) | 29 (2.8%)  |         |
| <b>Do you think insect consumption might become a common practice in the future?</b>                                            |            |              |              |              |            | p=0.071 |
| Yes                                                                                                                             | 98 (9.47%) | 116 (11.2%)  | 170 (16.44%) | 174 (16.82%) | 45 (4.35%) |         |
| No                                                                                                                              | 58 (5.6%)  | 72 (6.96%)   | 98 (9.47%)   | 157 (15.18%) | 18 (1.74%) |         |
| <b>In what preparations do you think insects would be more attractive?</b>                                                      |            |              |              |              |            | p<.001  |
| If their natural appearance cannot be seen                                                                                      | 91 (8.8%)  | 132 (12.76%) | 193 (18.66%) | 253 (24.46%) | 53 (5.12%) |         |
| If their natural appearance can be seen                                                                                         | 22 (2.12%) | 19 (1.83%)   | 31 (2.99%)   | 23 (2.22%)   | 7 (0.67%)  |         |
